# Supplementary material for: The ADAR RNA editing enzyme controls neuronal excitability in Drosophila melanogaster
Source: PubMed Central journal article supplement (PMC3902911; doi:10.1093/nar/gkt909), 2013-10-16
Supplement: supp_gkt909_nar-02014-a-2013-File008.pdf [file supp_gkt909_nar-02014-a-2013-File008.pdf]

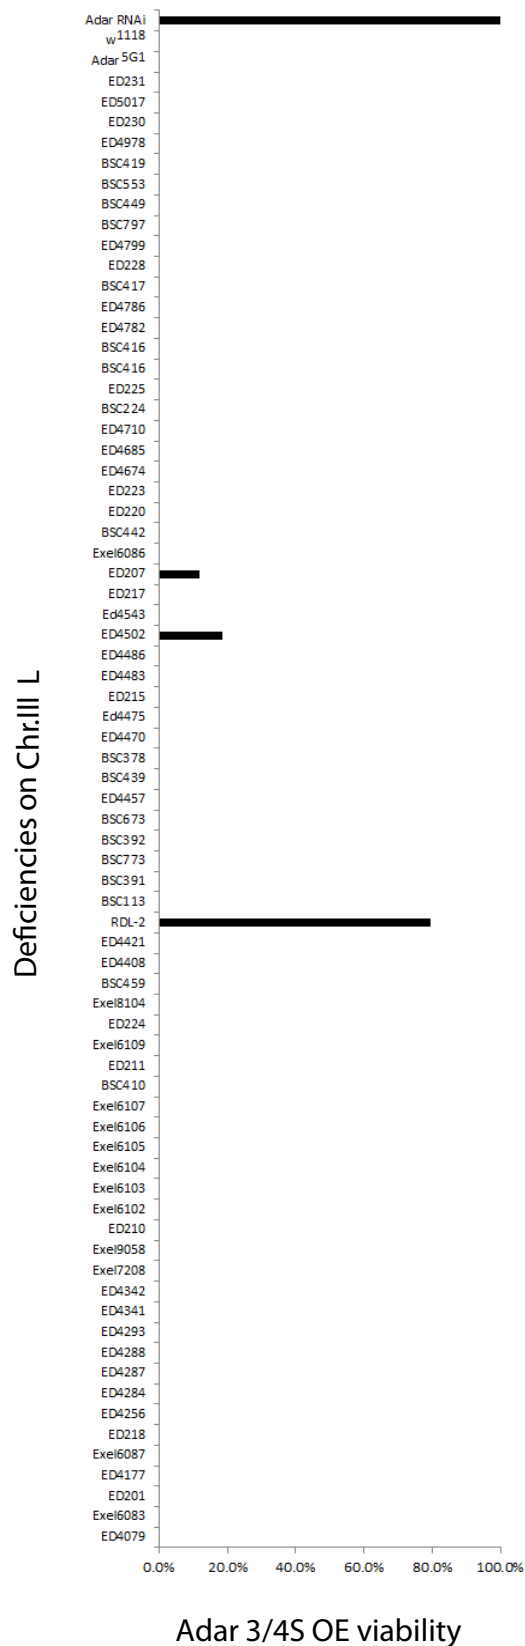

**Supplementary Figure 1.**

**Deficiency screen on Chromosome III left arm for rescue of lethality caused by *Adar3/4S* overexpression.** The y axis lists the deficiencies crossed with *Adar3/4S* OE and the horizontal bars show the viability of *Adar3/4S* OE, *Df* flies. The first three control columns on the y axis shows a full rescue by *Adar* RNAi and that no *Adar3/4S* OE progeny survive from crosses with *w*<sup>1118</sup> wild type flies or from crosses with *Adar*<sup>5G1</sup> flies.
