# Supplementary material for: The ADAR RNA editing enzyme controls neuronal excitability in Drosophila melanogaster
Source: PubMed Central journal article supplement (PMC3902911; doi:10.1093/nar/gkt909), 2013-10-16
Supplement: supp_gkt909_nar-02014-a-2013-File009.pdf [file supp_gkt909_nar-02014-a-2013-File009.pdf]

**Supplementary Table 1. Mapping the genes present in the deficiencies that rescue *Adar 3/4 S* OE lethality.**

| <b>Deficiencies</b> | <b>Rdl-2</b>                                         | <b>BSC508</b>                  | <b>ED5429</b>                                   | <b>ED10639</b>                                                                            | <b>ED5100</b>                                                  | <b>ED4502</b>                                                          | <b>ED207</b>                                                                              |
|---------------------|------------------------------------------------------|--------------------------------|-------------------------------------------------|-------------------------------------------------------------------------------------------|----------------------------------------------------------------|------------------------------------------------------------------------|-------------------------------------------------------------------------------------------|
| <b>Including</b>    | nwk, Rdl<br>S(CycEJP)<br>3.4<br>Tequila              |                                | Exel6153<br>Exel6264                            | Exel7329<br>Exel7330                                                                      | ED5020<br>ED5095<br>ED5066<br>BSC174<br>Exel6141               | BSC614                                                                 | BSC431<br>BSC250                                                                          |
| <b>Tested</b>       | -                                                    | -                              | -                                               | -                                                                                         | -                                                              | -                                                                      | -                                                                                         |
| <b>Negative:</b>    | nwk IR,<br>RdlIR                                     | ED10820<br>ED10845<br>Rab11 IR | Exel6153<br>Exel6264<br>ED5454                  | Exel7329<br>ED10642<br>Pak3 IR                                                            | ED5020<br>ED5095<br>ED5066<br>BSC174                           | BSC614<br>ED4543                                                       | BSC289<br>ED4177                                                                          |
| <b>Positive:</b>    | <b>+</b><br>Rdl <sup>1</sup><br>Rdl <sup>CB-2L</sup> | <b>+</b><br>slmb               |                                                 |                                                                                           | <b>+</b><br>Exel6141                                           |                                                                        |                                                                                           |
| <b>Candidates</b>   | <i>Rdl</i>                                           | <i>slmb</i>                    | <i>trabid</i><br><i>dalmatian</i><br><i>hyd</i> | <i>taranis</i><br><i>Spineless</i><br><i>Oxidation</i><br><i>reductase</i><br><i>etc.</i> | <i>Fip1</i><br>CG31523<br>CG14651<br>ED5021<br><i>Aux etc.</i> | <i>capricious</i><br><i>Acp70A</i><br><i>Rgl</i><br>4 unknown<br>genes | <i>Aplip1</i> ,<br><i>Mtaccp1</i> ,<br><i>LysB~S</i> ,<br><i>etc.</i><br>BSC431<br>BSC250 |
