# Supplementary material for: The ADAR RNA editing enzyme controls neuronal excitability in Drosophila melanogaster
Source: PubMed Central journal article supplement (PMC3902911; doi:10.1093/nar/gkt909), 2013-10-16
Supplement: supp_gkt909_nar-02014-a-2013-File010.pdf [file supp_gkt909_nar-02014-a-2013-File010.pdf]

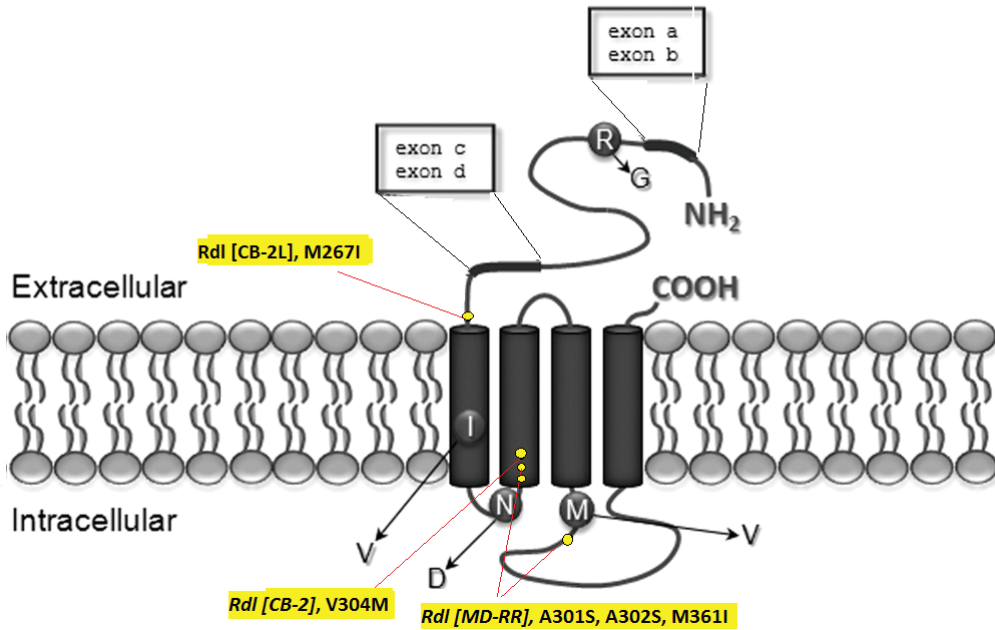

**Supplementary Figure 2.**

**Schematic structure of RDL in the cell membrane and positions of alternative splicing sites, editing sites and point mutations.** Two alternative splicing sites are in the extracellular region. Three *Rdl* mutants with their positions and amino acid changes are highlighted with yellow. Four editing sites are R122G, N294D, I283V and M360V. Figure adapted from Jones et al., 2009.
